# Supplementary material for: Health behaviours of young adults during the outbreak of the Covid-19 pandemic – a longitudinal study
Source: Springer Nature journal article supplement (doi:10.1186/s12889-021-11140-w), 2021-06-02
Supplement: MOESM1 [file 19222440]

## Author's own questionnaire

Dear Respondens,

We would like to ask you to voluntarily and anonymously fill out online questionnaire as a part of scientific research from the University of Rzeszow. The survey concerns about your health-related habits during the outbreak of Covid-19 pandemic. The questions come from author's own questionnaire as well as standardized international questionnaires related to eating habits, physical activity, sleep quality and mental well-being.

**Please state that You have read all of the information about the study and that you give a consent to the participation (obligatory field):**

YES     NO

Thank You in the participation in the study.

### PART I (author's own questionnaire)    Socio-demographic information

1. **Sex**     woman     man
2. **Age** .....
3. **Weight (kg)** ..... **Height (cm)** .....
4. **Place of residence**
  - Countryside
  - Town < 10 thousand residents
  - Town 10-100 thousand residents
  - City 100-300 thousand residents
  - City 300 thousand- 1 million residents
  - City > 1 million residents
5. **Living conditions**
  - Flat in a block < 50m<sup>2</sup>
  - Flat in a block 50- 100 m<sup>2</sup>
  - Flat in a block > 100m<sup>2</sup>
  - House 50- 100 m<sup>2</sup>
  - House > 100m<sup>2</sup>
6. **Number of house members**    number of adults.....number of children .....
7. **Education**     Secondary     Basic vocational     Higher
8. **Employment status during the pandemic**
  - Unemployed professionally active as before
  - Remote work during the pandemic
  - Student/pupil
9. **Type of the work** .....
10. **Comorbidities** .....

## 11. Smoking

- yes, 0-5 years
- yes, 5-10 years
- yes, >10 years
- no
- from time to time

## 12. Additional information, my status of COVID-19 during the study

.....

## PART II

- **FFQ6- modified version** (respondents provided two answers to each question, i.e. information on the last 7 days in the pandemic period and 7 days before the pandemic period. In original version questions concern about 12 months ago).

*Wądołowska L. Validation of food frequency questionnaire [FFQ]. Reproducibility assessment. Bromatol Chem Toksyk. 2005;38,1:27-33.*

### -**IPAQ-SF - short version (original)**

*Biernat E, Stupnicki R, Gajewski AK. Międzynarodowy Kwestionariusz Aktywności Fizycznej (IPAQ) – wersja polska. Wychowanie Fizyczne i Sport. 2007;51,1:47-54.*

### - **Pittsburgh Sleep Quality Index (PSQI) questionnaire(original)**

*Buysse DJ, Reynolds CF, Monk TH, Berman SR, Kupfer DJ. The Pittsburgh Sleep Quality Index: a new instrument for psychiatric practice and research. Psychiatry Res. 1989;28:193–213.*

### **GAD-7 Anxiety Severity (original)**

*Spitzer RL, Kroenke K, Williams JBW, Lowe B. A brief measure for assessing generalized anxiety disorder. Arch Intern Med. 2006;166:1092-1097.*
